# Supplementary material
Source: PubMed Central journal article supplement (PMC6460757)

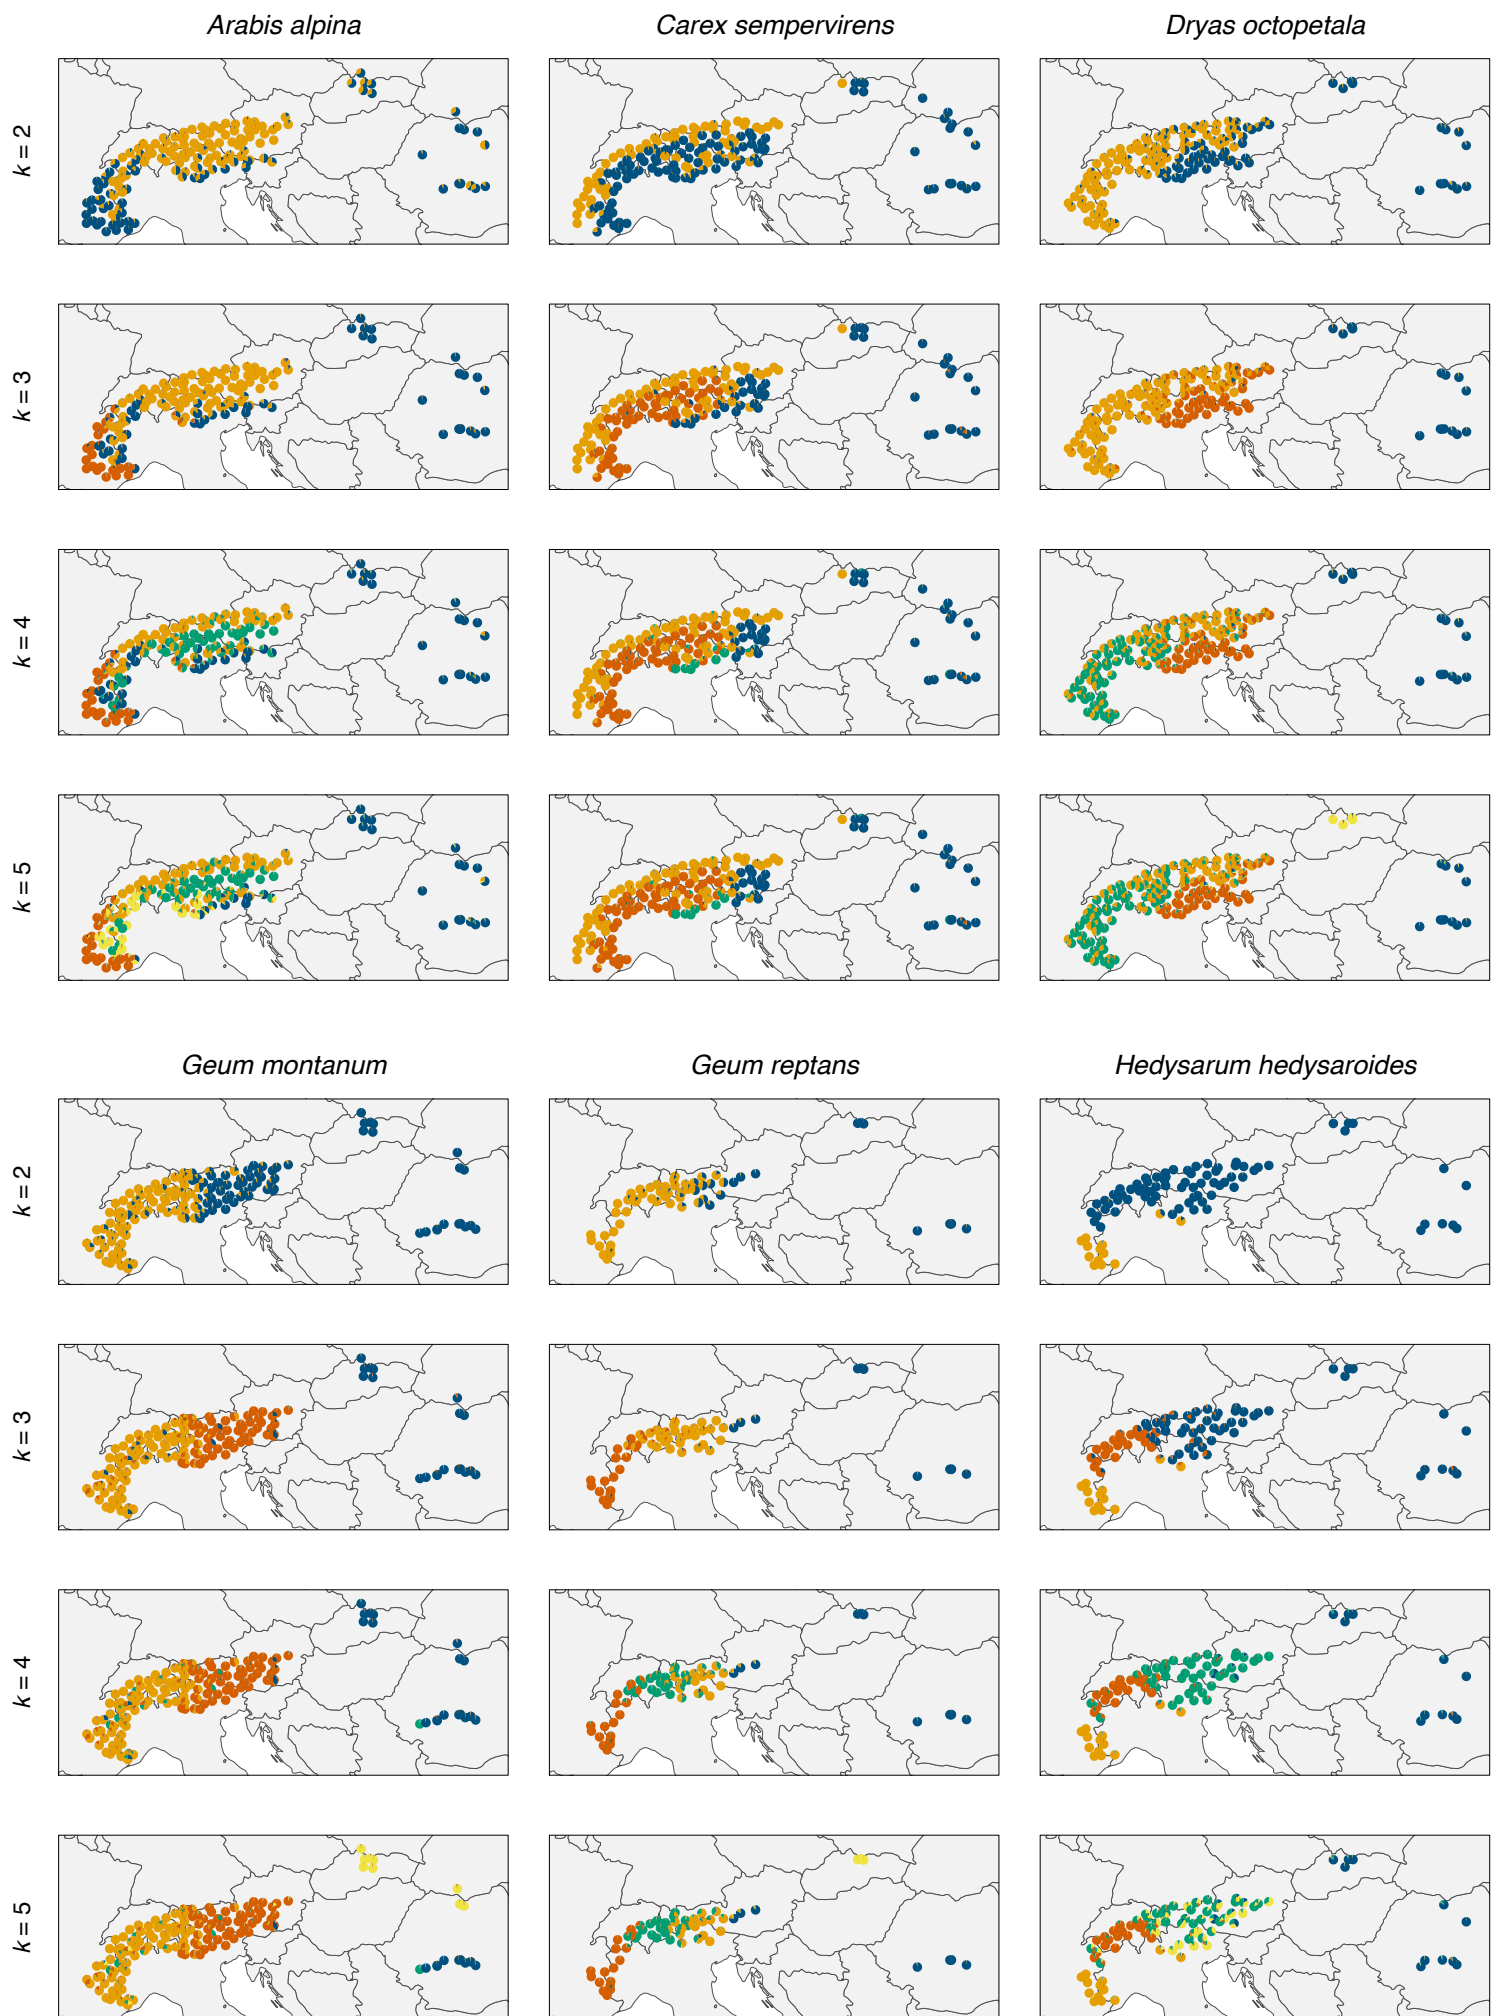

*Fig. S2.* Maps showing the results of STRUCTURE analyses of AFLP data for 12 alpine species with values of  $K$  ranging from  $K=2$  to  $K=4$ .

Meirmans, P.G. (2018) Subsampling reveals that unbalanced sampling affects Structure results in a multi-species dataset. *Heredity*

*Hypochaeris uniflora*

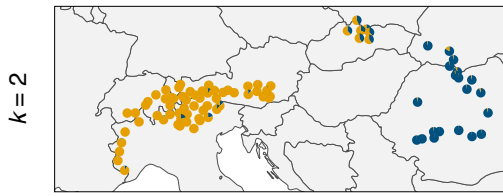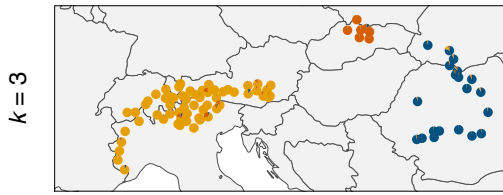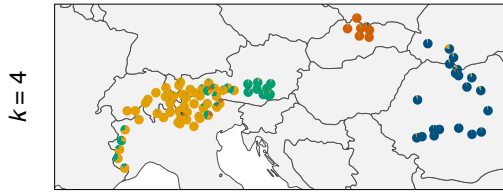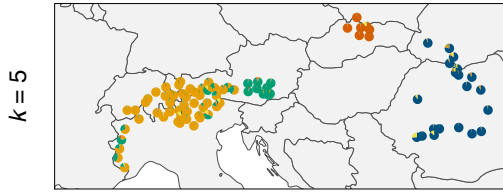

*Juncus trifidus*

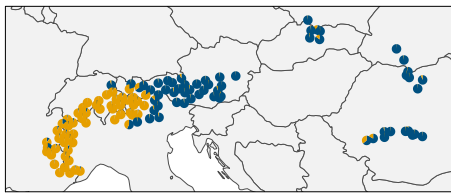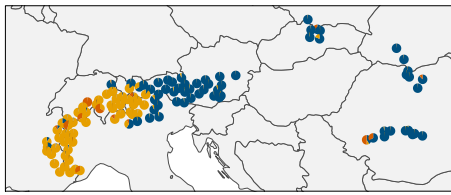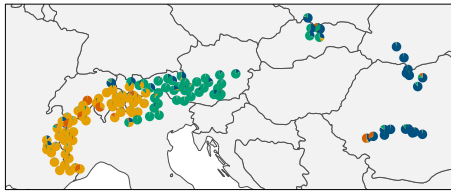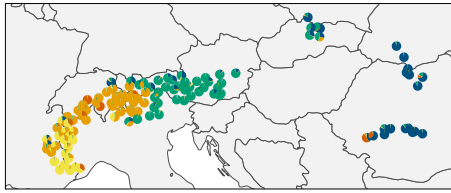

*Loiseleuria procumbens*

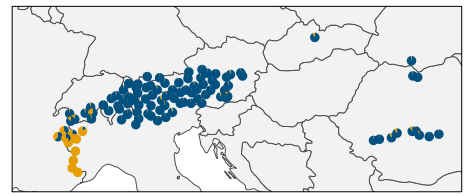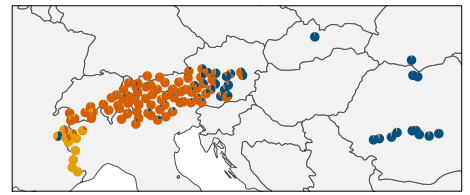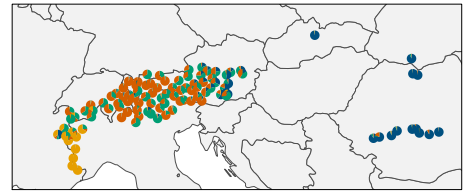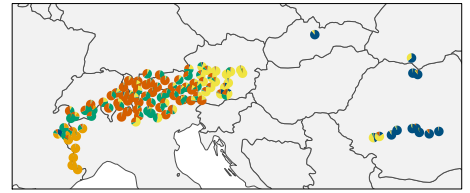

*Luzula alpinopilosa*

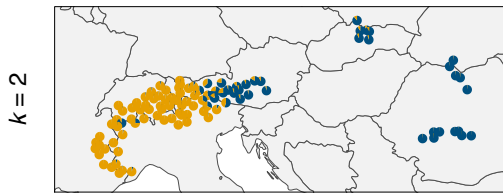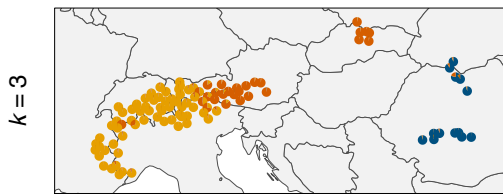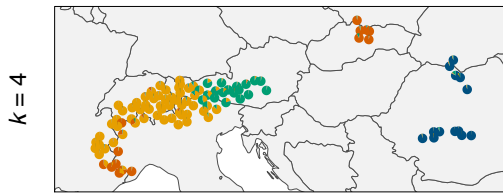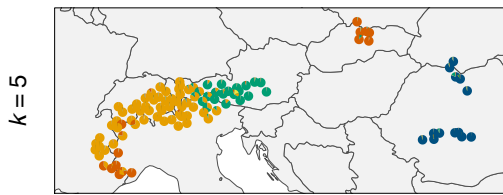

*Saxifraga stellaris*

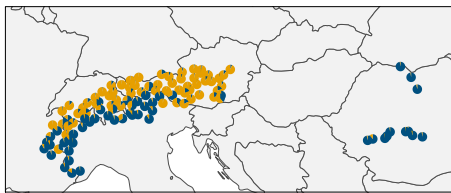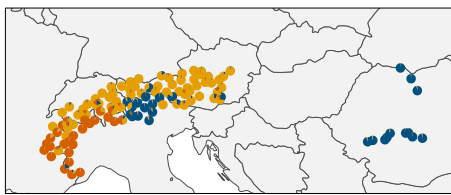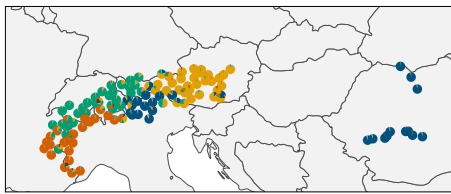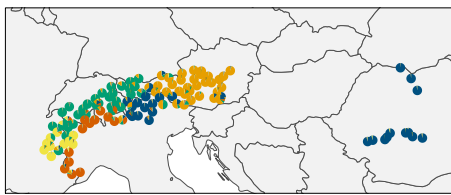

*Sesleria caerulea*

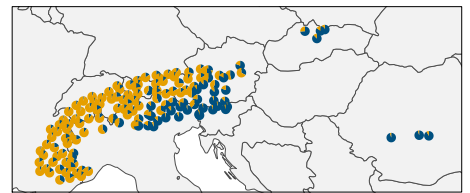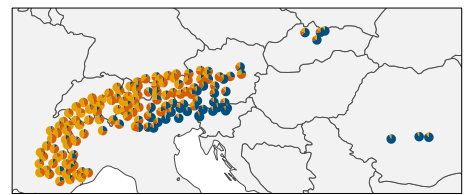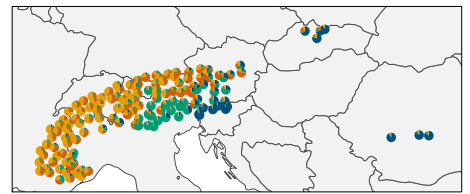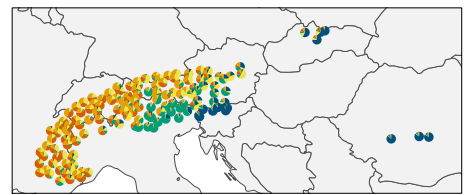

Supplement: 41437_2018_124_MOESM2_ESM.pdf [file 41437_2018_124_MOESM2_ESM.pdf]
