# Supplementary material
Source: PubMed Central journal article supplement (PMC6460757)
Supplement: 41437_2018_124_MOESM1_ESM.pdf [file 41437_2018_124_MOESM1_ESM.pdf]

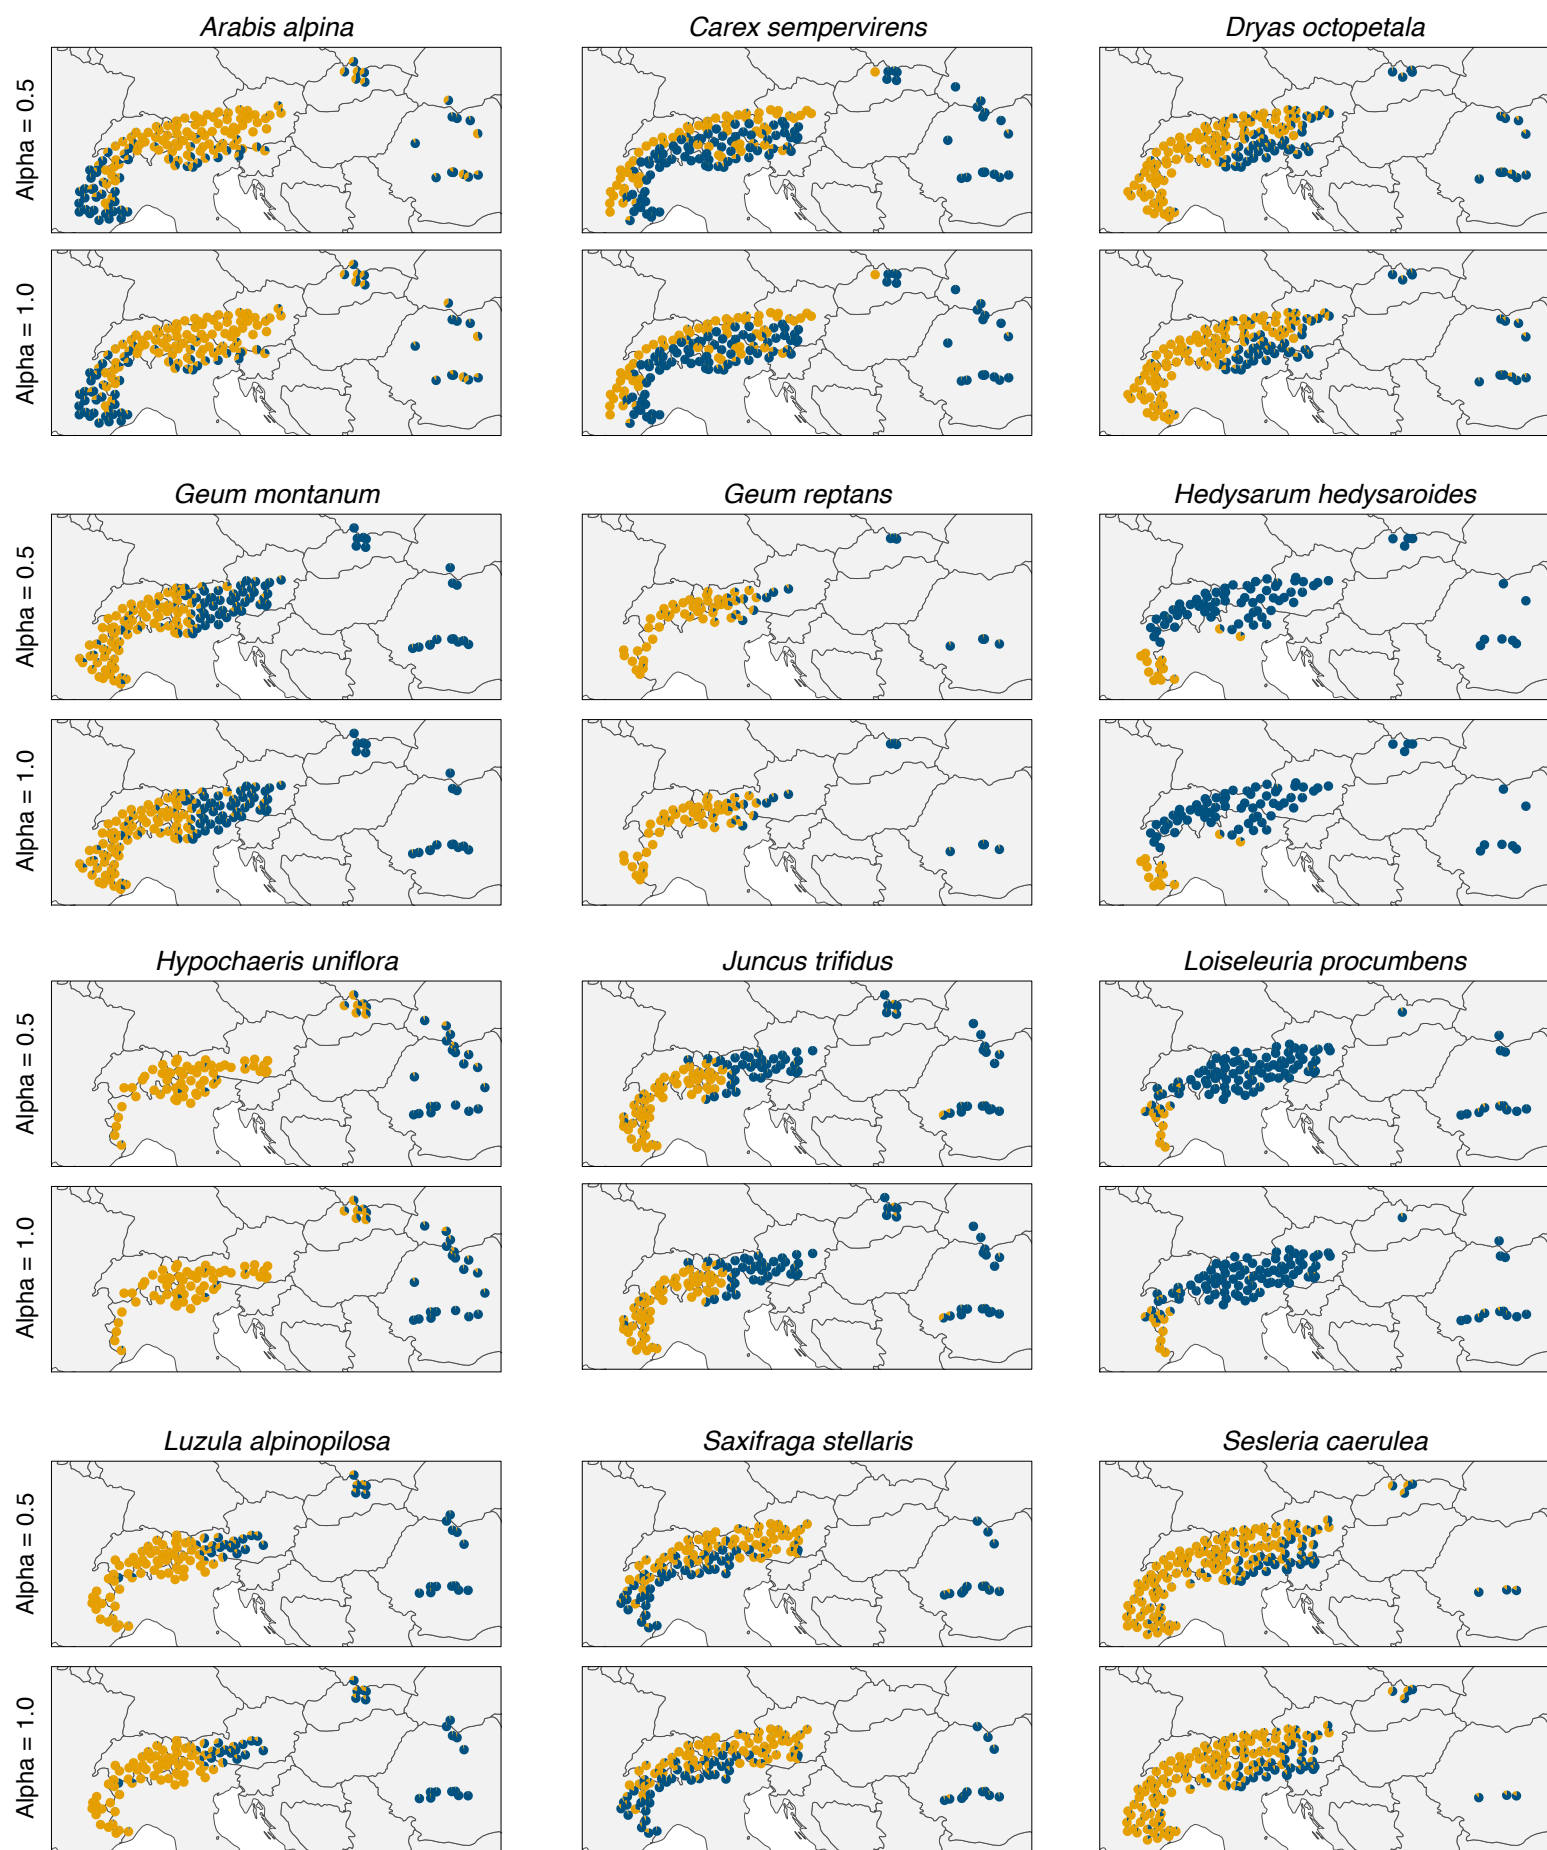

*Fig. S1.* Maps showing the results of STRUCTURE analyses of AFLP data for 12 alpine species, using the alternative ancestry model suggested by Wang (2017), with two different values of the alpha parameter.

Meirmans, P.G. (2018) Subsampling reveals that unbalanced sampling affects STRUCTURE results in a multi-species dataset. *Heredity*
