# Supplementary material
Source: PubMed Central journal article supplement (PMC6460757)
Supplement: 41437_2018_124_MOESM3_ESM.pdf [file 41437_2018_124_MOESM3_ESM.pdf]

Value of  $\Delta K$  with alternative ancestry model

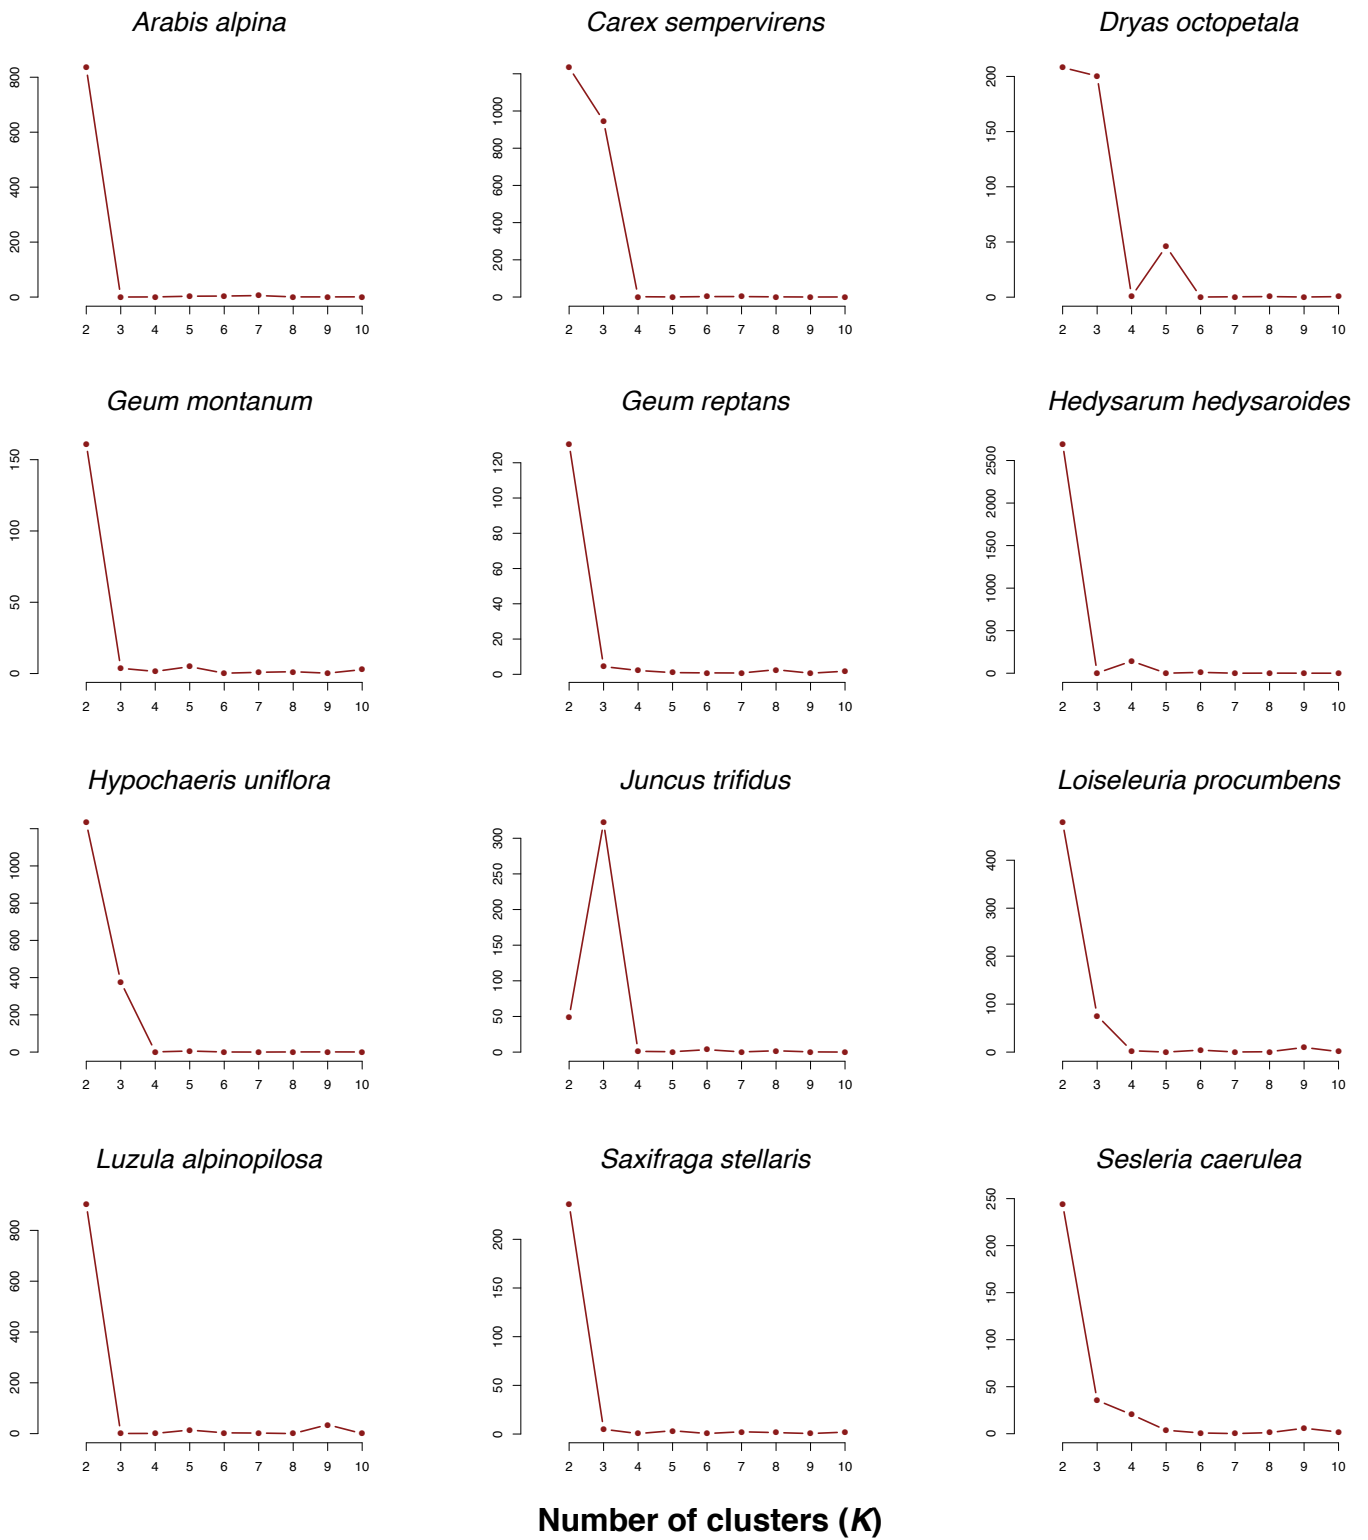

Fig. S3. Inference of the optimal number of clusters according to the  $\Delta K$ -statistic (Evanno *et al.* 2005) for 12 alpine species, using the alternative ancestry model suggested by Wang (2017), with  $\alpha=0.5$ .
